# Supplementary material for: Multitarget Stool mRNA Test for Detecting Colorectal Cancer Lesions Including Advanced Adenomas
Source: MDPI journal article supplement (doi:10.3390/cancers13061228), 2021-03-11
Supplement: s1 [file s1]

# Multitarget Stool mRNA Test for Detecting Colorectal Cancer Lesions Including Advanced Adenomas

Elizabeth Herring, Éric Tremblay, Nathalie McFadden, Shigeru Kanaoka and Jean-François Beaulieu

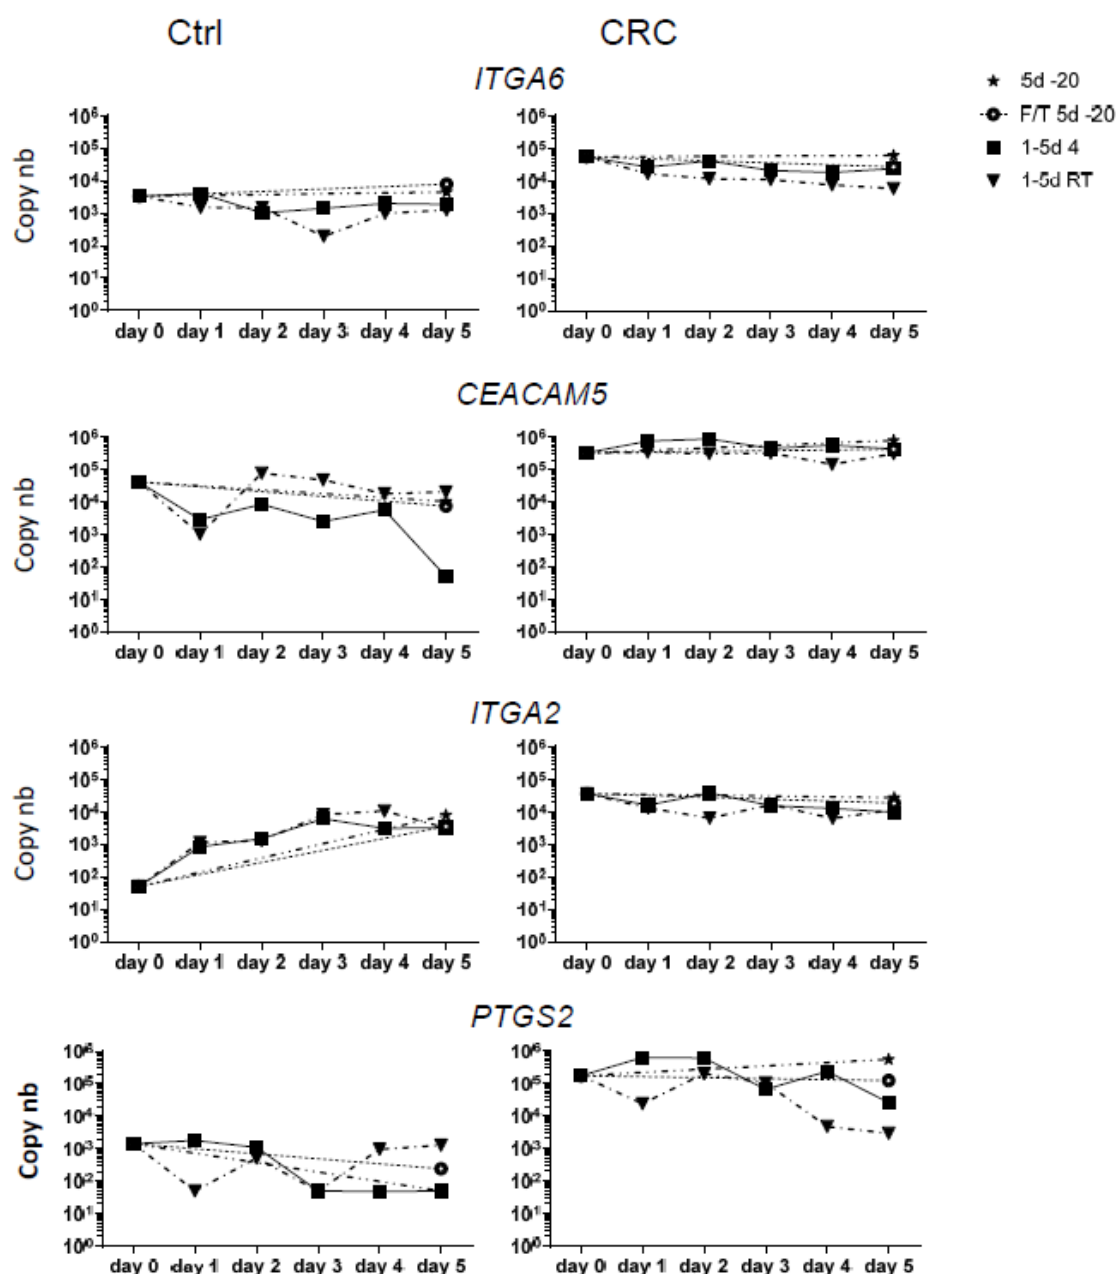

**Figure S1.** Target stability analyses in stool samples over a 5-day period. Target stability was tested under various conditions of conservation and target detection was monitored throughout the 5 days in samples maintained at  $-20^{\circ}\text{C}$  with (F/T 5d  $-20$ ) and without (5d  $-20$ ) a thaw cycle, at  $4^{\circ}\text{C}$  (1-5d 4) and at room temperature (1-5d RT). As evaluated with ITGA6, CEACAM5, ITGA2 and PTGS2, copy numbers remained relatively stable during the 5 days in both control stool samples (Ctrl) and samples obtained from CRC patients.
